# Supplementary material for: Adenosine Receptor Agonists Exhibit Anti-Platelet Effects and the Potential to Overcome Resistance to P2Y12 Receptor Antagonists
Source: PubMed Central journal article supplement (PMC6982709; doi:10.3390/molecules25010130), 2019-12-28
Supplement: molecules-25-00130-s001.pdf [file molecules-25-00130-s001.pdf]

**Supplementary Materials:**

**Table S1.** Coefficients of variation obtained in aggregometric, cytometric, and thrombus formation under flow conditions experiments carried out in single (either P2Y<sub>12</sub> antagonist or AR agonist alone) and dual (P2Y<sub>12</sub> antagonist and AR agonist applied simultaneously) systems (*n* = 5 per experimental method).

| CV [%]                                   | NECA | regadenoson | LUF5835 | cangrelor | PM  | cangrelor +NECA | cangrelor + regadenoson | cangrelor + LUF5835 | PM + NECA | PM + regadenoson | PM + LUF5835 |
|------------------------------------------|------|-------------|---------|-----------|-----|-----------------|-------------------------|---------------------|-----------|------------------|--------------|
| aggregation                              | 22   | 28          | 21      | 54        | 38  | 50              | 47                      | 43                  | 14        | 20               | 40           |
| cytometry: P-selectin                    | 28   | 26          | 23      | 31        | 41  | 48              | 50                      | 41                  | 45        | 38               | 41           |
| cytometry: PAC-1                         | 19   | 14          | 19      | 35        | 35  | 53              | 50                      | 42                  | 44        | 38               | 41           |
| thrombus formation under flow conditions | 93   | 184         | 110     | 103       | 104 | 150             | 121                     | 151                 | 128       | 129              | 97           |
